# Supplementary material for: Tristetraprolin expression by keratinocytes protects against skin carcinogenesis
Source: JCI journal article supplement (doi:10.1172/jci.insight.140669), 2021-01-26
Supplement: sd1 [file 1]

## Tristetraprolin expression by keratinocytes protects against skin carcinogenesis

Assabban *et al*, Supplementary figures

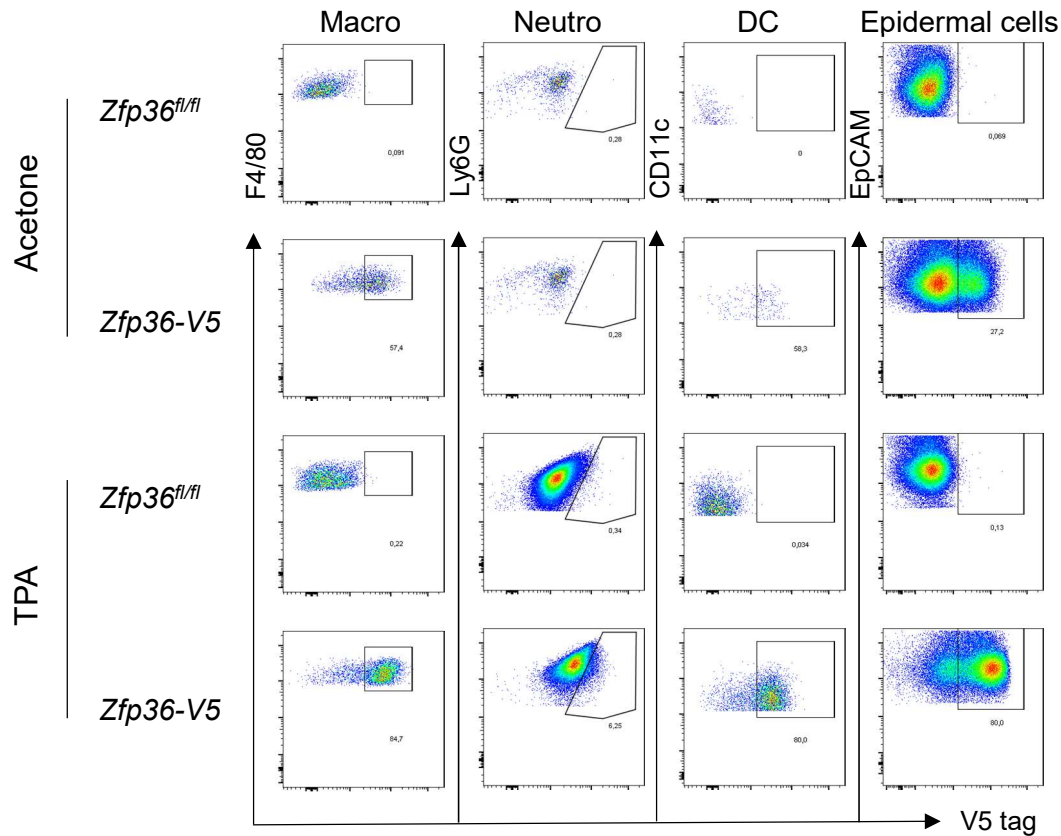

**Figure S1 (related to Figure 2A): Gating strategies for skin cell populations after acute inflammatory stimulation.** *Zfp36-V5* and *Zfp36<sup>fl/fl</sup>* mice were treated for 3 days with TPA or acetone. Representative skin immune cells were gated based on the following gating strategy: MHCII<sup>high</sup> macrophages (CD45<sup>+</sup>CD19<sup>-</sup>CD3 $\epsilon$ <sup>-</sup>CD11b<sup>+</sup>Ly6G<sup>-</sup>F4/80<sup>+</sup>MHCII<sup>high</sup>), neutrophils (CD45<sup>+</sup>CD19<sup>-</sup>CD3 $\epsilon$ <sup>-</sup>CD11b<sup>+</sup>Ly6G<sup>+</sup>) and DCs (CD45<sup>+</sup>CD19<sup>-</sup>CD3 $\epsilon$ <sup>-</sup>CD11b<sup>+</sup>Ly6G<sup>-</sup>F4/80<sup>-</sup>CD11c<sup>+</sup>MHCII<sup>+</sup>). Keratinocytes were gated based on CD45<sup>-</sup>CD140a<sup>-</sup>CD31<sup>-</sup>EpCAM<sup>+</sup> staining.

## Neutrophils

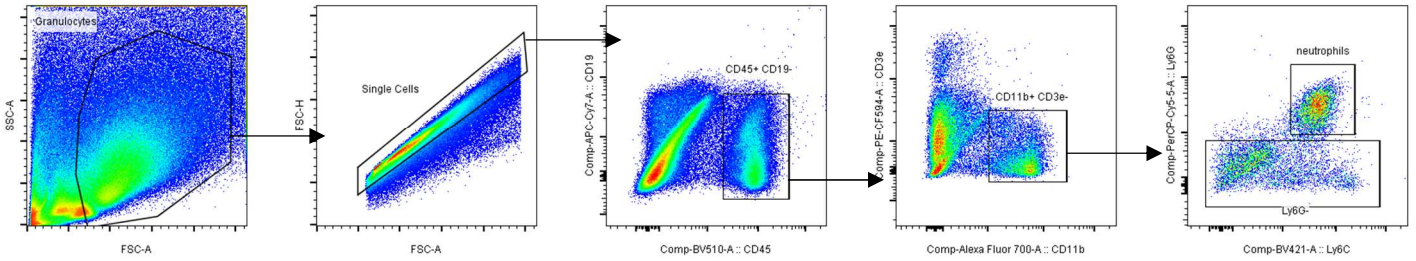

## $\gamma\delta$ T cells

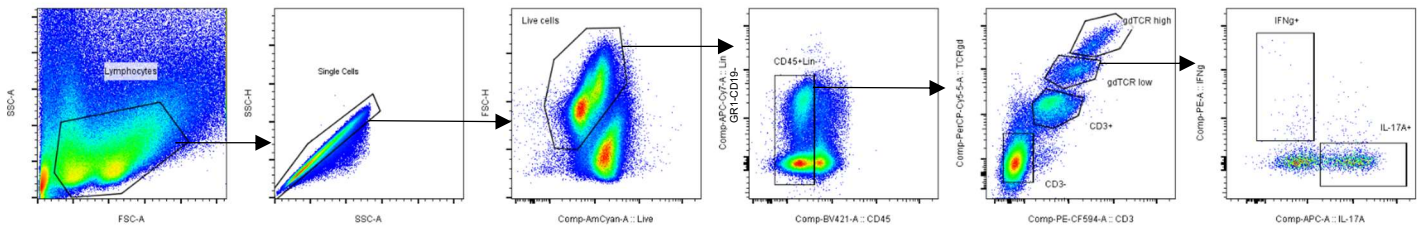

**Figure S2 (related to Figure 2D): Gating strategies for skin immune cell populations after DMBA/TPA treatment.** *Zfp36<sup>ΔEP</sup>* mice and their littermate controls (*Zfp36<sup>fl/fl</sup>*) were topically treated on back skin with DMBA/TPA for 12 to 20 weeks. After exclusion of doublets, neutrophils were characterized based on CD19-CD3 $\epsilon$ -CD45<sup>+</sup>CD11b<sup>+</sup>Ly6C<sup>+</sup>Ly6G<sup>hi</sup>. After exclusion of dead cells, IL17A-producing dermal  $\gamma\delta$  T cells were selected by GR1-CD19-CD45<sup>+</sup>CD3 $\epsilon$ <sup>+</sup> $\gamma\delta$ TCR<sup>+</sup>IL17A<sup>+</sup> staining.

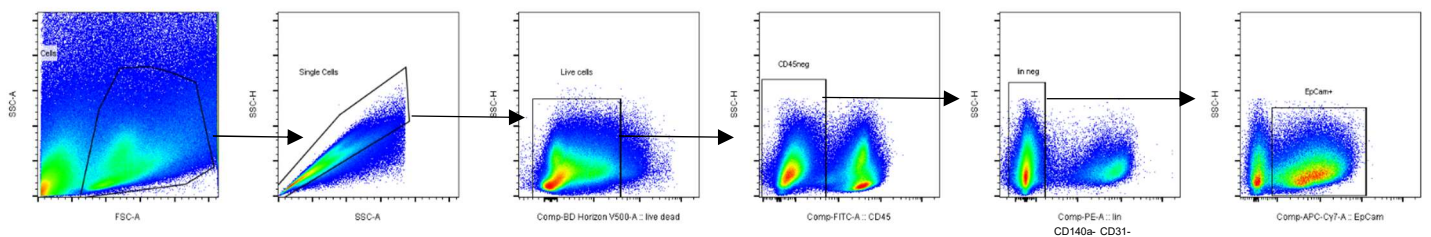

**Figure S3 (related to Figure 4): Gating strategy to isolate EpCAM-positive cells from skin and tumors after DMBA/TPA treatment.** After up to 40 weeks of carcinogenic treatment on *Zfp36<sup>ΔEP</sup>* and control mice, epithelial cells from papillomas (~3 mm size), adjacent non-tumoral skin and mock skin, were sorted by exclusion of dead cells and CD45-CD140a-CD31-EpCAM<sup>+</sup> selection.

## Supplementary table

**Table S1: List of RT-PCR primers**

| Target        | Sequence FW 5' to 3'         | Sequence RV 5' to 3'          | Taqman probe 5' to 3'              |
|---------------|------------------------------|-------------------------------|------------------------------------|
| <i>Actb</i>   | TCC-TGA-GCG-CAA-GTA-CTC-TGT  | CTG-ATC-CAC-ATC-TGC-TGG-AAG   | ATC-GGT-GGC-TCC-ATC-CTG-GC         |
| <i>Areg</i>   | GGA-CAA-TGC-AGG-GTA-AAA-GTT- | TGA-AAG-AAG-GAC-CAA-TGT-CAT-  | /                                  |
| <i>Cxcl1</i>  | CCG-AAG-TCA-TAG-CCA-CAC-TC   | TTT-CTG-AAC-CAA-GGG-AGC-TT    | AAG-GCA-AGC-CTC-GCG-ACC-AT         |
| <i>Cxcl2</i>  | ACA-TCC-AGA-GCT-TGA-GTG-TGA  | GCC-CTT-GAG-AGT-GGC-TAT-G     | CCC-ACT-GCG-CCC-AGA-CAG-AA         |
| <i>Il17f</i>  | ATT-CCA-GAA-CCG-CTC-CAG-TT   | CTG-GGC-CTC-AGC-GAT-CTC-T     | TGG-GAT-TAC-AAC-ATC-ACT-CGA-GAC-CC |
| <i>Inhba</i>  | GGA-GAA-CGG-GTA-TGT-GGA-GA   | TGG-TCC-TGG-TTC-TGT-TAG-CC    | /                                  |
| <i>Lcn2</i>   | GAC-TTC-CGG-AGC-GAT-CAG-T    | ACA-TCG-TAA-AGC-TGC-CTT-CTG   | TGG-ACC-GCA-TTG-CCT-GCCAGG-CCC-A   |
| <i>Lif</i>    | AGA-ATC-AAC-TGG-CAC-AGC      | TGG-AAA-GAT-GGG-AAG-TCT-G     | /                                  |
| <i>Pgf</i>    | CCG-GCC-CTG-GCT-GCA-TTG-AA   | CAG-GCA-AAG-CCC-ACA-GGC-GA    | /                                  |
| <i>S100a8</i> | CCT-TTG-TCA-GCT-CCG-TCT-TC   | CAA-GGC-CTT-CTC-CAG-TTC-AG    | AAG-GAA-ATC-TTT-CGT-GACAAT-GCC-G   |
| <i>S100a9</i> | AGC-CTT-GAG-CAA-GAA-GAT-GG   | TTG-ATG-GAA-GGT-GTC-GAT-GA    | TGG-AGC-GCA-GCA-TAA-CCA-CCA        |
| <i>Sema4d</i> | CCG-ACC-TGG-AGC-GTG-TAT-C    | AGA-CAA-ACT-TCC-TCC-CCT-TC    | /                                  |
| <i>Sema6d</i> | CAG-AAG-CAT-GGG-AGA-TGG-AT   | GCC-ACC-CAT-GTC-GTT-TTT-AC    | /                                  |
| <i>Tnf</i>    | CAG-ACC-CTC-ACA-CTC-AGA-TCA  | CAC-TTG-GTG-GTT-TGC-TAC-GA    | TCG-AGT-GAC-AAG-CCT-GTA-GCC-CA     |
| <i>Zfp36</i>  | GAC-CAC-CGG-ACA-CTG-AAC-T    | TCC-TGG-AAT-CTT-AAG-TGCTGT-GA | /                                  |
